# Supplementary material
Source: PubMed Central journal article supplement (PMC4652181)
Supplement: Supp_Fig1.pdf [file Supp_Fig1.pdf]

## Supplementary Data

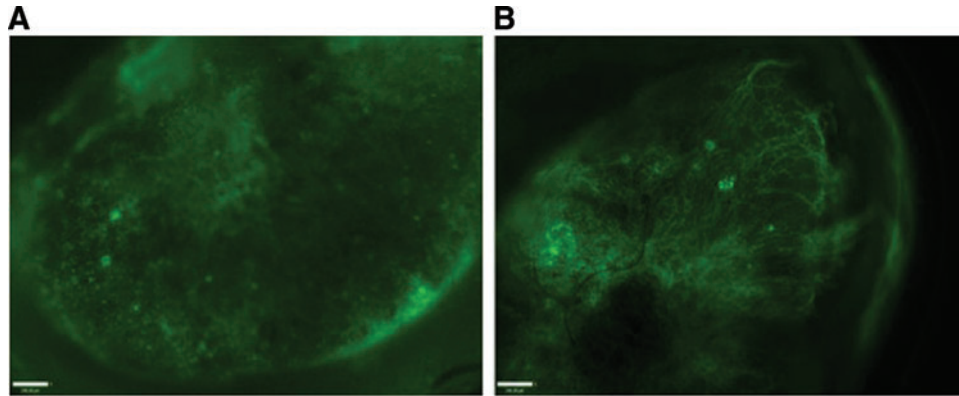

**SUPPLEMENTARY FIG. S1.** Optical clearing of explanted collagen gels at 2 weeks. **(A)** Low power view of explanted collagen gel containing GFP glomeruli without ECs before optical clearing. **(B)** Same gel after 11 days of optical clearing. Scale bars are 240  $\mu$ m. ECs, endothelial cells; GFP, green fluorescent protein.
