# Supplementary material
Source: PubMed Central journal article supplement (PMC4652181)
Supplement: Supp_Fig2.pdf [file Supp_Fig2.pdf]

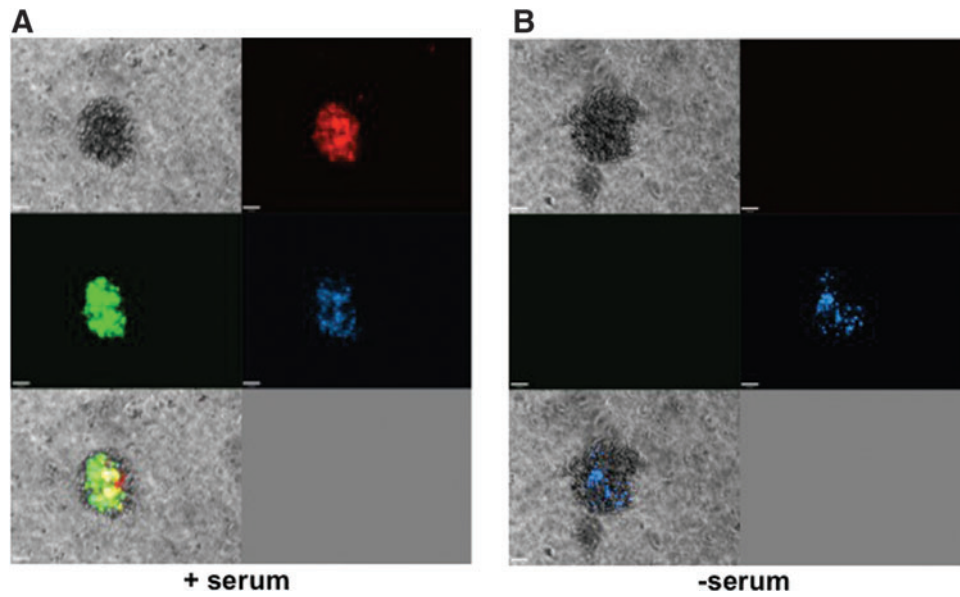

**SUPPLEMENTARY FIG. S2.** *In vitro* testing of CellTracker™ glomerular survival assay. (A) GFP glomerulus suspended within collagen gel in the presence of 10% serum for 1 week. (B) GFP glomerulus suspended in collagen gel without serum for 1 week. Phase contrast, GFP (*green*), CellTracker (*red*), Hoechst nuclear stain (*blue*), and merged images shown for both panels. Scale bars are 30  $\mu\text{m}$ . GFP, green fluorescent protein.
